# Supplementary material for: The Effect of Dextrose or Protein Ingestion on Circulating Growth Differentiation Factor 15 and Appetite in Older Compared to Younger Women
Source: MDPI journal article supplement (doi:10.3390/nu14194066), 2022-09-30
Supplement: s1 [file s1]

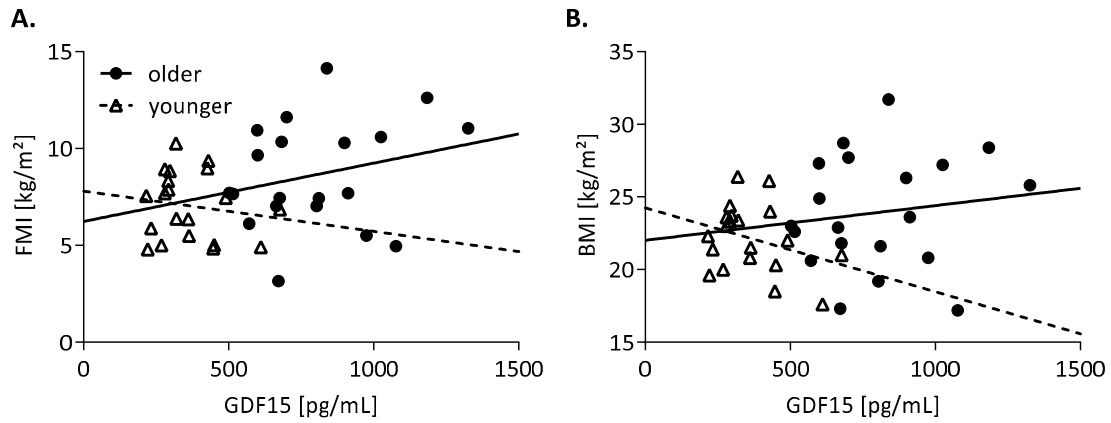

**Figure S1.** Correlation of baseline GDF15 concentrations and **A.** FMI and **B.** BMI. BMI: body mass index, FMI: fat mass index.

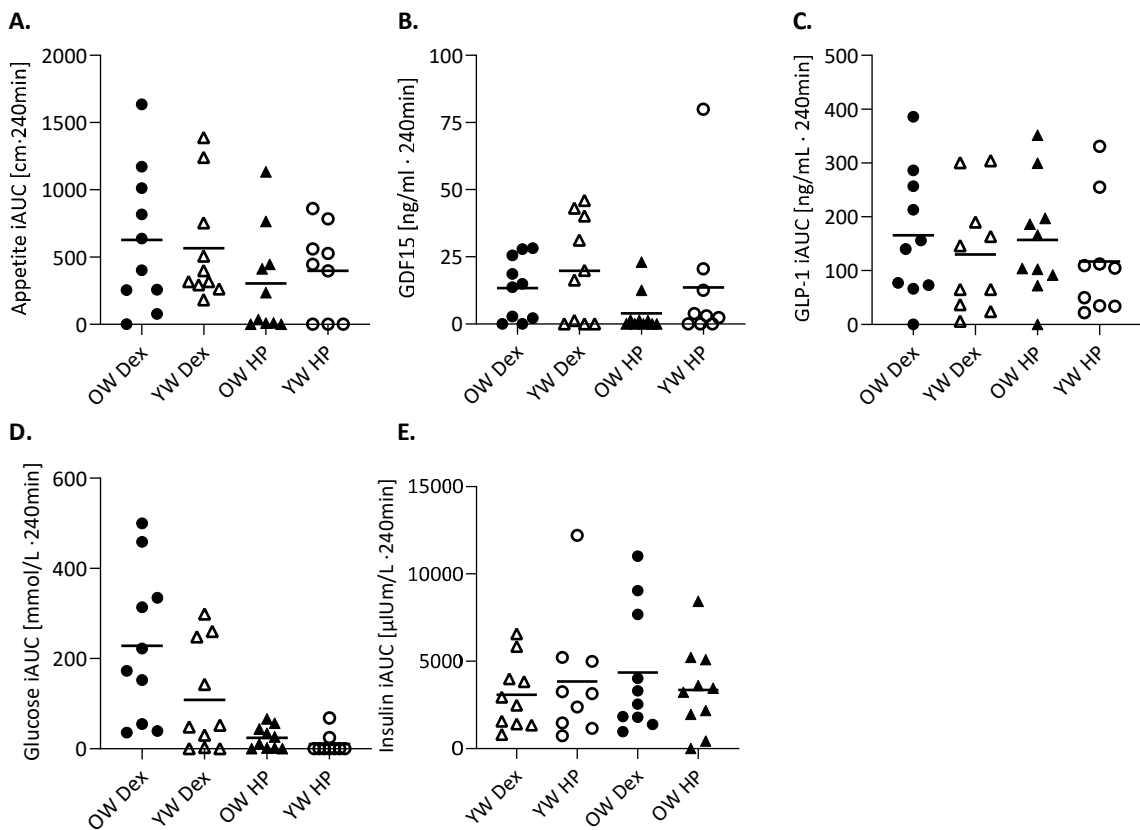

**Figure S2.** Incremental area under the curve (iAUC) for appetite (A.), GDF15 (B.), GLP-1 (C.), glucose (D.) and insulin (E.) for each test meal and age group. OW: older women, YW: younger women, Dex: Dextrose, HP: high protein.
